# Supplementary material for: The Association between Serum Uric Acid Levels and 10-Year Cardiovascular Disease Risk in Non-Alcoholic Fatty Liver Disease Patients
Source: MDPI journal article supplement (doi:10.3390/ijerph19031042), 2022-01-18
Supplement: s1 [file s1]

**Supplementary Table S1.** The association between serum uric acid quartile and having a high CVD risk

| Serum uric acid<br>(quartile,<br>mg/dL) | Crude model         |                 | Model 1             |                 | Model 2             |                 |
|-----------------------------------------|---------------------|-----------------|---------------------|-----------------|---------------------|-----------------|
|                                         | OR (95% CI)         | <i>p</i> -value | OR (95% CI)         | <i>p</i> -value | OR (95% CI)         | <i>p</i> -value |
| Q1 (<4.1)                               | 0.36<br>(0.31–0.43) | <0.001          | 0.25<br>(0.21–0.30) | <0.001          | 0.70<br>(0.52–0.94) | 0.017           |
| Q2 (4.1–4.7)                            | 0.48<br>(0.41–0.57) | <0.001          | 0.36<br>(0.30–0.42) | <0.001          | 0.96<br>(0.73–1.26) | 0.761           |
| Q3 (4.8–5.7)                            | 0.69<br>(0.60–0.80) | <0.001          | 0.56<br>(0.48–0.66) | <0.001          | 0.83<br>(0.66–1.05) | 0.115           |
| Q4 (≥5.8)                               | Ref                 |                 | Ref                 |                 | Ref                 |                 |

Model 1: adjusted for educational status, household income, physical activity, obesity, and chronic kidney disease. Model 2: adjusted for age, gender, smoking status, hypertension, diabetic status, and dyslipidaemia at model 1.
